# Supplementary material for: A hydrogen peroxide activatable nanoprobe for light-controlled “double-check” multi-colour fluorescence imaging
Source: Royal Society of Chemistry journal article supplement (doi:10.1039/d0nr04881j), 2020-01-01
Supplement: d0nr04881j1.pdf [file d0nr04881j1.pdf]

## Electronic Supplementary Information

### **Hydrogen Peroxide Activatable Nanoprobe for Light-controlled “Double-Check” Multi-colour Fluorescence Imaging**

*Xing Zhang,<sup>‡ab</sup> Youxin Fu,<sup>‡a</sup> Jianping Liu,<sup>‡a</sup> Guangren Qian,<sup>b</sup> Junji Zhang,<sup>c</sup> Run Zhang,<sup>\*a</sup> and Zhi Ping Xu<sup>\*a</sup>*

<sup>a</sup> Australian Institute for Bioengineering and Nanotechnology, The University of Queensland, St Lucia, QLD 4072, Australia  
E-mail: r.zhang@uq.edu.au, gordonxu@uq.edu.au

<sup>b</sup> School of Environmental Science and Chemical Engineering, Shanghai University, Shanghai 200444, China

<sup>c</sup> Key Laboratory for Advanced Materials and Joint International Research Laboratory of Precision Chemistry and Molecular Engineering, Feringa Nobel Prize Scientist Joint Research Centre, School of Chemistry and Molecular Engineering, East China University of Science & Technology, Shanghai, 200237, China

<sup>‡</sup> These authors contributed equally to this work.

## **Table of Contents**

**S1.** General Information

**S2.** Characterization of **Poly-SP-Np-B** and intermediates

**S3.** Light-controlled multiple colour fluorescence response in solution

**S4.** Light-controlled multiple colour fluorescence imaging

**S5.** Reference

## **S1. General Information**

### **Materials and physical measurements**

3-(4,5-Dimethylthiazol-2-yl)-2,5-diphenyltetrazolium bromide (MTT) and lipopolysaccharide (LPS), were purchased from Sigma-Aldrich. Dulbecco's Modified Eagle Medium (DMEM), fetal bovine serum (FBS), *L*-glutamine, penicillin, and streptomycin sulphate were purchased from Life Technologies. The PBS buffer consisting of 137 mM NaCl, 2.7 mM KCl, 10.1 mM Na<sub>2</sub>HPO<sub>4</sub> and 1.8 mM KH<sub>2</sub>PO<sub>4</sub> was prepared in our laboratory. Solvents used are of analytical grade, except those for recrystallization and optical tests, which were distilled prior to use. Thin-layer chromatography (TLC) was carried out on aluminium sheets coated with silica gel 60 F254 (MERCK). All other chemicals were used as received unless otherwise indicated. Deionized distilled water was used throughout. All oxygen or moisture sensitive reactions were performed under argon atmosphere using the standard Schleck method.

<sup>1</sup>H NMR Spectra were recorded using Bruker AM-400 Spectrometers. DMSO-*d*<sub>6</sub>, CDCl<sub>3</sub> were used as solvent. Absorption and fluorescence Spectra were recorded using Varian Cary 500 and SHIMADZU RF-5301 PC Fluorescence Spectrometer, respectively. The UV (365 nm, 2.6 mW cm<sup>-2</sup>) and visible light (550 nm, 150 mW) were used as light sources for UV and visible light irradiation, respectively. The size of polymer nanoparticles were measured on a Nano Zeta-Sizer (Malvern Instruments). The morphology of the nanoparticles were characterized using transmission electron microscope (TEM) (Hitachi HT7700). Confocal fluorescence imaging in live cells were carried out on a Leica SP8 laser-scanning microscope. The images were analysis by ImageJ software version 1.44p, and colocalisation analysis was performed by a Co-localization Analysis Plugin. Flow cytometry analysis was performed on an Accuri C6 flow cytometer with a 488 nm laser excitation and emission filter of 525 ± 20 nm and 610 ± 20 nm. The data were analysed with CytExpert software. All data were presented as the mean ± SD for each group of three experiments.

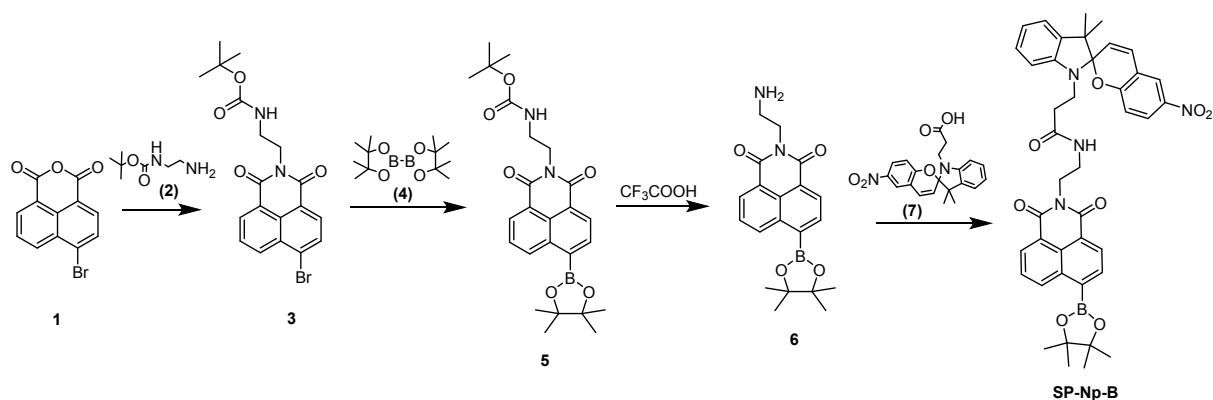

**Scheme S1.** Synthesis procedure of SP-Np-B.

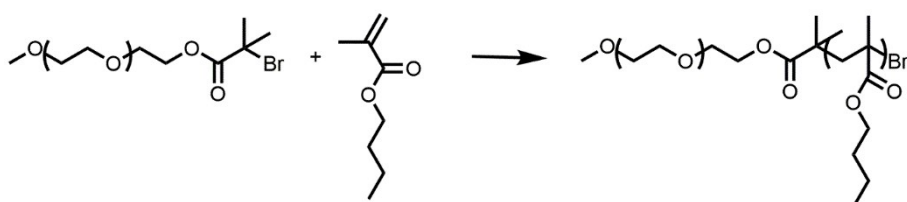

**Scheme S2.** Design and Synthesis of mPEG-b-PBMA<sup>[1-3]</sup>

### General information for Ploy-SP-Np-B reacting with H<sub>2</sub>O<sub>2</sub>

Solution of **Poly-SP-Np-B** (10 μM) was prepared by dispersing as-prepared nanoparticles in PBS (0.01 M, pH 7.4). Stock solution of 1 mM of H<sub>2</sub>O<sub>2</sub> was prepared in PBS (0.01 M, pH 7.4). The fluorescence spectra of nanoprobe for H<sub>2</sub>O<sub>2</sub> activation was measured using a quartz cuvette of path length of 5 mm. The excitation wavelength was performed at 440 nm and emission between 450 and 750 nm was recorded. The slit for both excitation and emission spectra was 5 nm. Unless otherwise mentioned, all the spectra were recorded at 298 K.

### Photochromic test in solution

Solution of **Poly-SP-Np-B** (10 μM) was prepared by dispersing as-prepared nanoparticle in PBS (0.01 M, pH 7.4). **Poly-SP-Np** was prepared in-situ by adding 100 μM H<sub>2</sub>O<sub>2</sub> into 10 μM **Poly-SP-Np-B** in PBS (0.01 M, pH 7.4). The solution was irradiated with UV light (365 nm)

in darkroom. Fluorescence spectra were recorded every 2 s irradiation until the maximum spectrum changes obtained. Then the solution was irradiated with visible light (550 nm) in darkroom. The fluorescence spectra were tested every 2 s irradiation until the spectra retained unchanged. The light-controlled reversible fluorescence switch measurements for **Poly-SP-Np-B/Poly-SP-Np** nanoparticles were carried out with a quartz cuvette of a path length of 1 cm. For the green channel fluorescence ( $\lambda_{em} = 450-750$  nm) and red channel fluorescence ( $\lambda_{em} = 560-750$  nm), excitations were performed at 440 nm and 550 nm, respectively. The slit for both excitation and emission spectra was 5 nm. Unless otherwise mentioned, all the spectra were recorded at 298 K.

### **Cell line and cell culture**

Murine macrophage cell line, RAW 264.7 (ATCC® TIB-71™) was obtained from American Type Cell Collection. RAW 264.7 cells were cultured in DMEM media, supplemented with 10% fetal bovine serum and penicillin (10 U/mL) /streptomycin (10  $\mu$ g/mL). All cells were cultured in a humidified incubator at 37 °C and 5% CO<sub>2</sub>. The cell growth medium was replaced every two days. RAW 264.7 cells were routinely detached with trypsin-EDTA solution and then seeded in a 25 mL cell culture bottle. The cells were reached about 80% confluence before experiments.

### **Fluorescence imaging and photochromic test in cells**

Three group experiments were performed to evaluate the feasibility of light-controlled “double-check” fluorescence imaging in live cells. For each group experiment, sequential irradiation by UV light (365 nm, 2.6 mW cm<sup>-2</sup>) for 10 s and Vis-light (550 nm, 150 mW) for 20 s in a darkroom was performed, followed by fluorescence imaging of both green and red channels after each irradiation. The excitation wavelength was 405 nm, 442 nm, and 550 nm and emission channel 450-470 nm, 520-540 nm, and 600-620 nm for DAPI, green channel and red channel, respectively.<sup>[4-5]</sup>

**Group 1:** for “double-check” fluorescence imaging, RAW 264.7 macrophage cells were typically seeded at a density of  $5 \times 10^4$  cells/mL in a cover glass-bottomed culture dish ( $\phi = 22$  mm). After 24 h growth in incubator, the culture medium was carefully replaced with freshly prepared medium containing **Poly-SP-Np-B** (10  $\mu$ M). Then, the cells were incubated at 37 °C for another 2 h. RAW 264.7 cells were washed with PBS for three times before confocal microscopy imaging.

**Group 2:** for exogenous H<sub>2</sub>O<sub>2</sub> activation and multiple colour fluorescence imaging, **Poly-SP-Np-B** internalized RAW 264.7 cells were incubated with 100  $\mu$ M H<sub>2</sub>O<sub>2</sub> in PBS for 30 min. Cells were washed with PBS for three times before microscope imaging.

**Group 3:** for endogenous H<sub>2</sub>O<sub>2</sub> activation and multiple colour fluorescence imaging, RAW 264.7 macrophage cells were pre-treated with lipopolysaccharide (LPS, 200 ng/mL) for 24 h, and then incubated with **Poly-SP-Np-B** (10  $\mu$ M) for another 2 h. The cells were then washed with PBS prior to the confocal microscope imaging.<sup>[6]</sup>

### **Flow cytometry analysis**

Flow cytometry analysis was performed to evaluate the fluorescence responses of photochromic nanoprobe in live cells. RAW 264.7 cells were seeded in a 6-well plate at a density of  $1 \times 10^6$  cells/well. Three group experiments were then conducted similar to above fluorescence imaging.

**Group 1:** After 24 h incubation at 37 °C, the culture medium was discarded and the cells were washed with PBS for three times. Cells were then incubated with freshly prepared medium containing **Poly-SP-Np-B** (10  $\mu$ M) at 37 °C for another 2 h.

**Group 2:** Group 1 cells were further treated with 100  $\mu$ M H<sub>2</sub>O<sub>2</sub> in PBS for 30 min.

**Group 3:** After 24 h incubation at 37 °C, the cells were treated with LPS (200 ng/mL) for 24 h. The culture medium was discarded and then the cells were further incubated with **Poly-SP-Np-B** (10  $\mu$ M) at 37 °C for another 2 h.

For flow cytometry analysis, the cells were suspended by treating with trypsin and collected after washing with PBS. For each group of experiment, alternate irradiations by UV light (365 nm) for 10 s and Vis-light (550 nm) for 20 s in darkroom were performed and the flow cytometry analysis were obtained by measuring fluorescence of  $1 \times 10^4$  cells from each cell population.

### **Lysosome colocalisation**

For lysosome colocalisation analysis, RAW 264.7 macrophage cells were typically seeded at a density of  $5 \times 10^4$  cells/mL in a cover glass-bottomed culture dish ( $\phi = 22$  mm). After incubation at 37 °C for 24 h, the cell culture medium was replaced with freshly prepared medium containing **Poly-SP-Np-B** (10  $\mu$ M) and the cells were further incubated at 37 °C for 2 h. Then, the cells were stained with LysoSensor<sup>TM</sup> Green following protocol from Life Technologies. Cells were then rinsed with PBS before subjecting to microscope imaging. Cells was irradiated by alternate UV/Vis light and fluorescence images were recorded with a confocal laser scanning microscope.

### **Cell viability assay**

Cell cytotoxicity was assessed by the typical 3-(4, 5-dimethylthiazol-2-yl)-2, 5-diphenyltetrazolium bromide (MTT) reduction assay. RAW 264.7 macrophage cells were seeded in a 96-well plates in growth medium at the density of  $5 \times 10^4$  cells per well. After 24 h, the culture medium was replaced with a fresh medium containing **Poly-SP-Np-B** of different concentrations (0, 10, 20, 40, 80, 100, 200  $\mu$ M). The group with the addition of culture medium only was employed as the control, and the wells containing culture media without cells were used as blanks. The cells were then incubated in a humidified incubator for another 24 h. MTT solution in PBS buffer was then added into each well after the removal of culture media, followed by further incubation for 4 h in a dark at 37 °C. Finally, excess MTT solution was carefully removed and the formed formazan was dissolved by adding of dimethyl sulfoxide (DMSO, 100  $\mu$ L) to each well. The absorbance at 490 nm was measured in an Infinite M200

Pro Microplate Reader. The results from the five individual experiments were averaged. The following formula was used to calculate the viability of cell growth: Viability (%) = (mean of absorbance value of treatment group - blank)/(mean absorbance value of control - blank) × 100.

### **Photocytotoxicity**

Photocytotoxicity was assessed by the typical 3-(4, 5-dimethylthiazol-2-yl)-2, 5-diphenyltetrazolium bromide (MTT) reduction assay. RAW 264.7 macrophage cells were seeded in a 96-well plates in growth medium at the density of  $5 \times 10^4$  cells per well. After 24 h, the cells were incubated with **Poly-SP-Np-B** (10  $\mu$ M) for 2 h. After washing with PBS for three times, irradiation with UV/Vis light (365 nm/550 nm) for different cycles (0-7) was performed. MTT solution in PBS buffer was then added into each well after the removal of culture media, followed by further incubation for 4 h in a dark at 37 °C. Finally, excess MTT solution was carefully removed and the formed formazan was dissolved by adding of dimethyl sulfoxide (DMSO, 100  $\mu$ L) to each well. The absorbance at 490 nm was measured in an Infinite M200 Pro Microplate Reader. The results from the five individual experiments were averaged. The following formula was used to calculate the viability of cell growth: Viability (%) = (mean of absorbance value of treatment group - blank)/(mean absorbance value of control - blank) × 100.



## 2. Characterization of Poly-SP-Np-B and intermediates

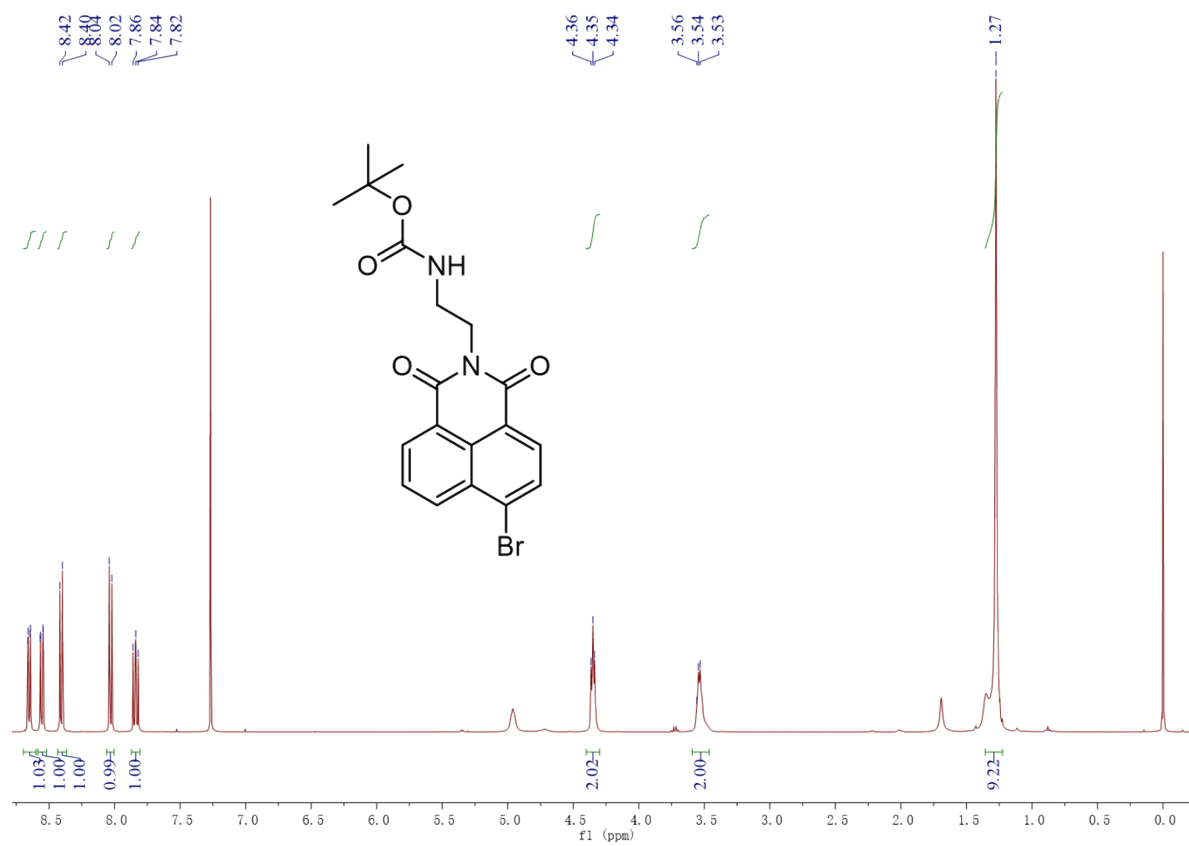

**Fig. S1.** <sup>1</sup>H NMR of Compound 3.

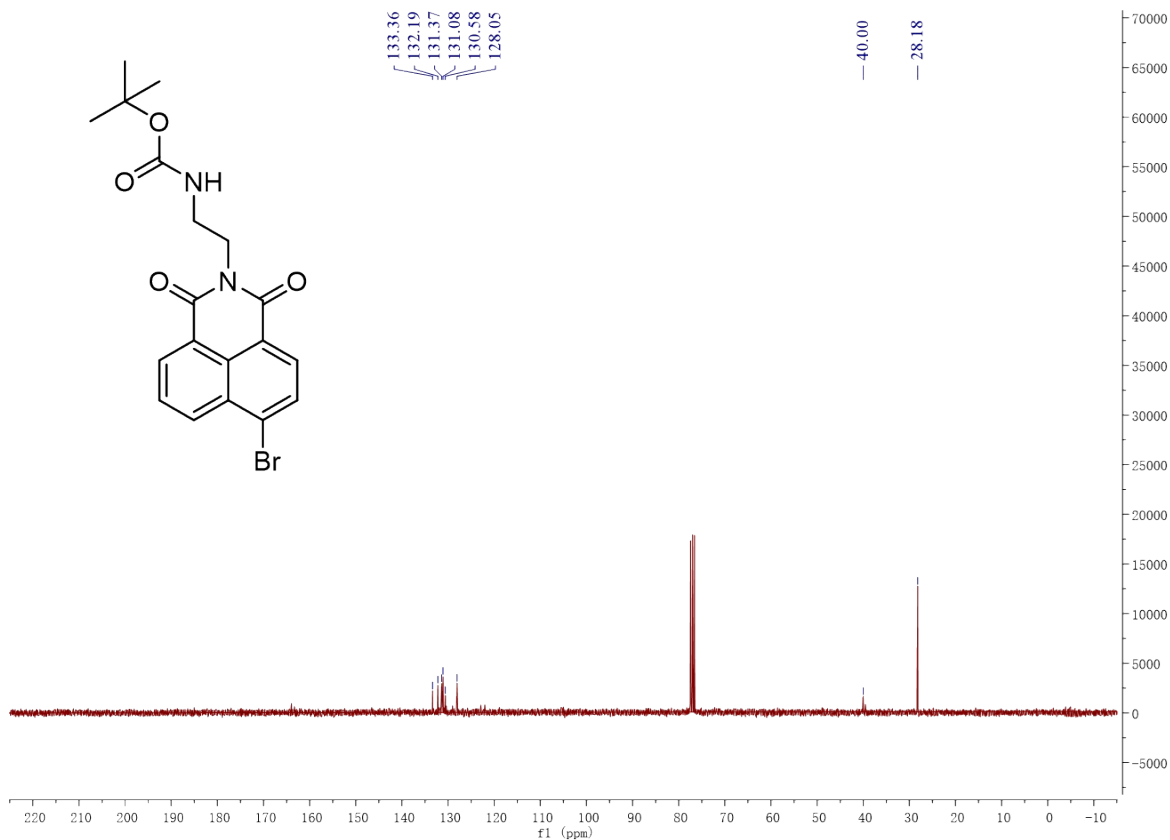

**Fig. S2.**  $^{13}\text{C}$  NMR of Compound **3**.

**Elemental Composition Report**

**Single Mass Analysis**

Tolerance = 5.0 PPM / DBE: min = -1.5, max = 50.0

Element prediction: Off

Number of isotope peaks used for i-FIT = 2

Monoisotopic Mass, Even Electron Ions

34 formula(e) evaluated with 1 results within limits (up to 50 closest results for each mass)

Elements Used:

C: 0-19 H: 0-99 N: 0-2 O: 0-4 Br: 0-1

H-TIAN

TH-ZYD-102 60 (0.673) Cm (60:61)

1: TOF MS ES+  
2.79e+003

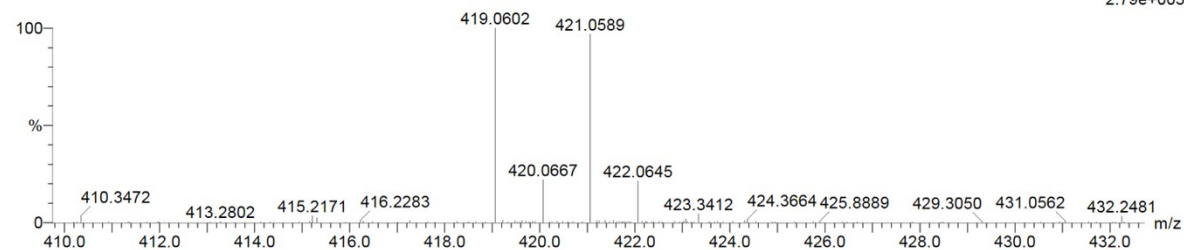

Minimum:

Maximum:

| Mass     | Calc. Mass | mDa  | PPM  | DBE  | i-FIT | i-FIT (Norm) | Formula          |
|----------|------------|------|------|------|-------|--------------|------------------|
| 419.0602 | 419.0606   | -0.4 | -1.0 | 10.5 | 87.7  | 0.0          | C19 H20 N2 O4 Br |

**Fig. S3.** MS of Compound **3**.

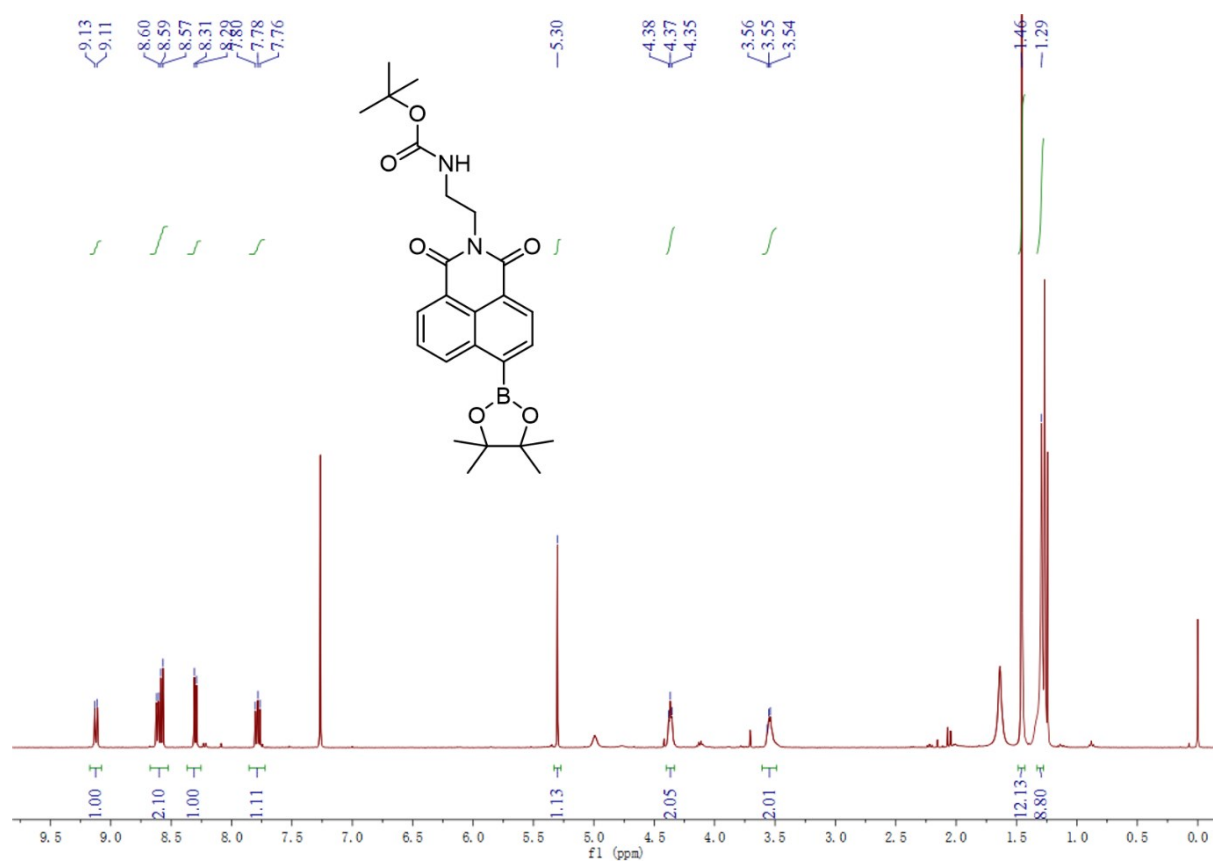

**Fig. S4.** <sup>1</sup>H NMR of Compound 5.

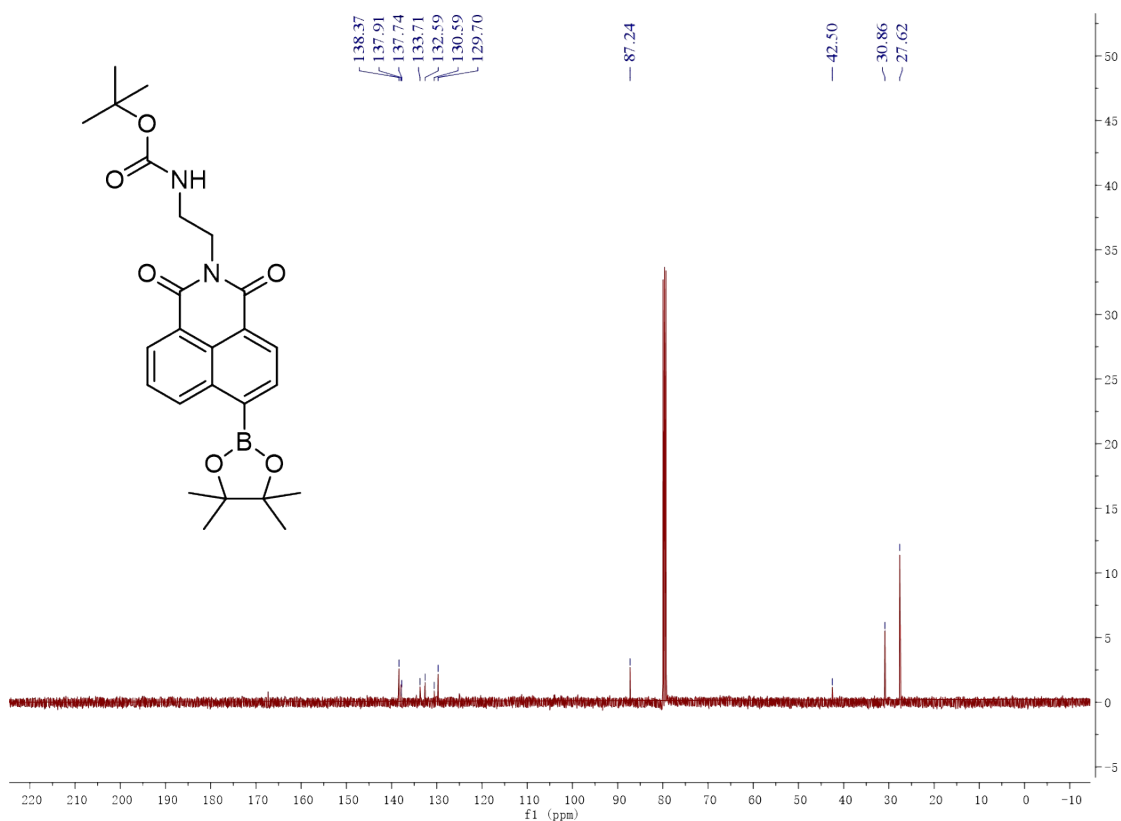

**Fig. S5.**  $^{13}\text{C}$  NMR of Compound 5.

### Elemental Composition Report

Page 1

#### Single Mass Analysis

Tolerance = 50.0 PPM / DBE: min = -1.5, max = 100.0

Element prediction: Off

Number of isotope peaks used for i-FIT = 3

Monoisotopic Mass, Even Electron Ions

32 formula(e) evaluated with 1 results within limits (up to 1 best isotopic matches for each mass)

Elements Used:

C: 0-25 H: 0-32 N: 0-2 O: 0-6 B: 1-2

WH-ZHU

ECUST institute of Fine Chem

13-Jun-2017

14:46:14

TH-ZX-001 28 (0.445) Cm (28)

1: TOF MS ES+

7.57e+002

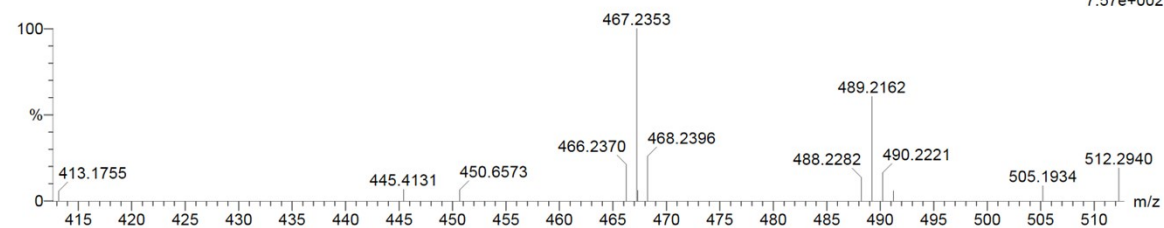

Minimum: -1.5  
Maximum: 30.0 50.0 100.0

| Mass     | Calc. Mass | mDa | PPM | DBE  | i-FIT | i-FIT (Norm) | Formula                                                         |
|----------|------------|-----|-----|------|-------|--------------|-----------------------------------------------------------------|
| 467.2353 | 467.2353   | 0.0 | 0.0 | 11.5 | 14.8  | 0.0          | C <sub>25</sub> H <sub>32</sub> N <sub>2</sub> O <sub>6</sub> B |

**Fig. S6.** MS of Compound 5.

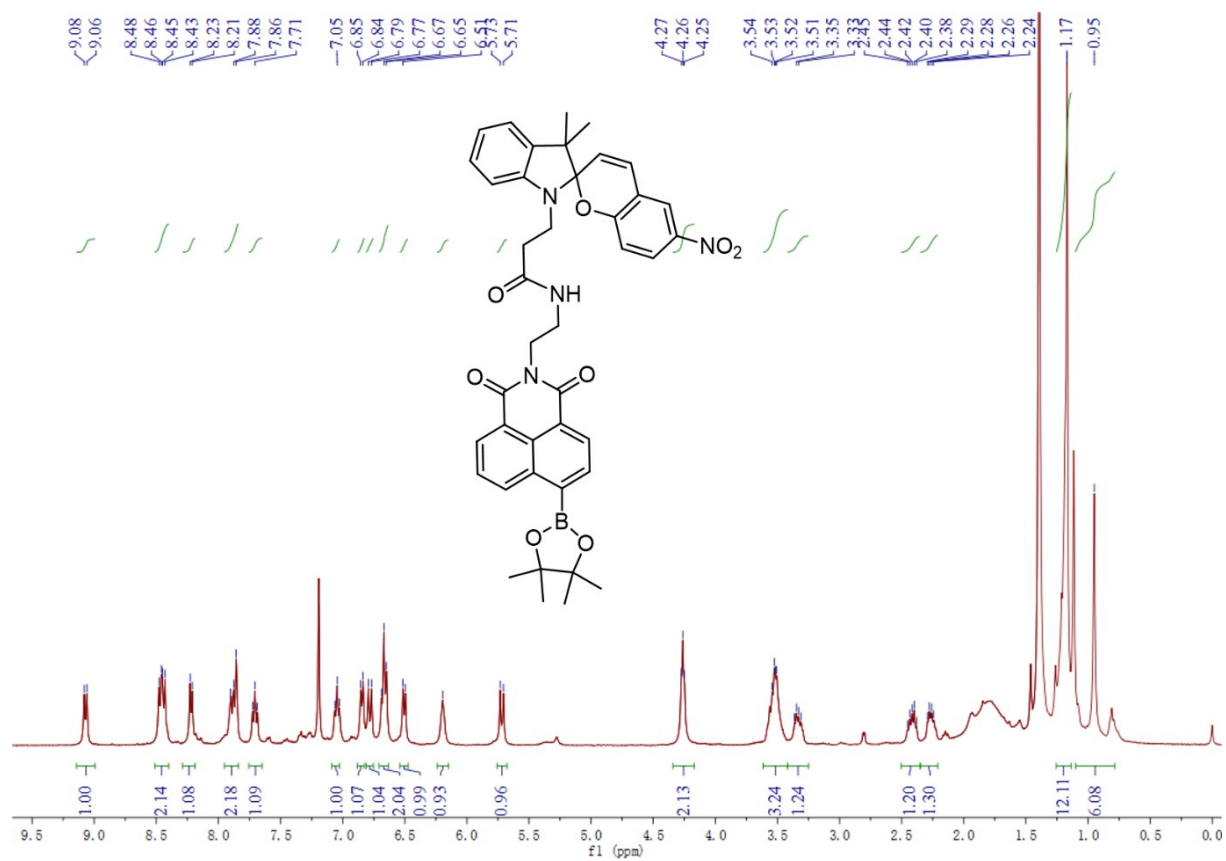

**Fig. S7.** <sup>1</sup>H NMR of Compound SP-Np-B.

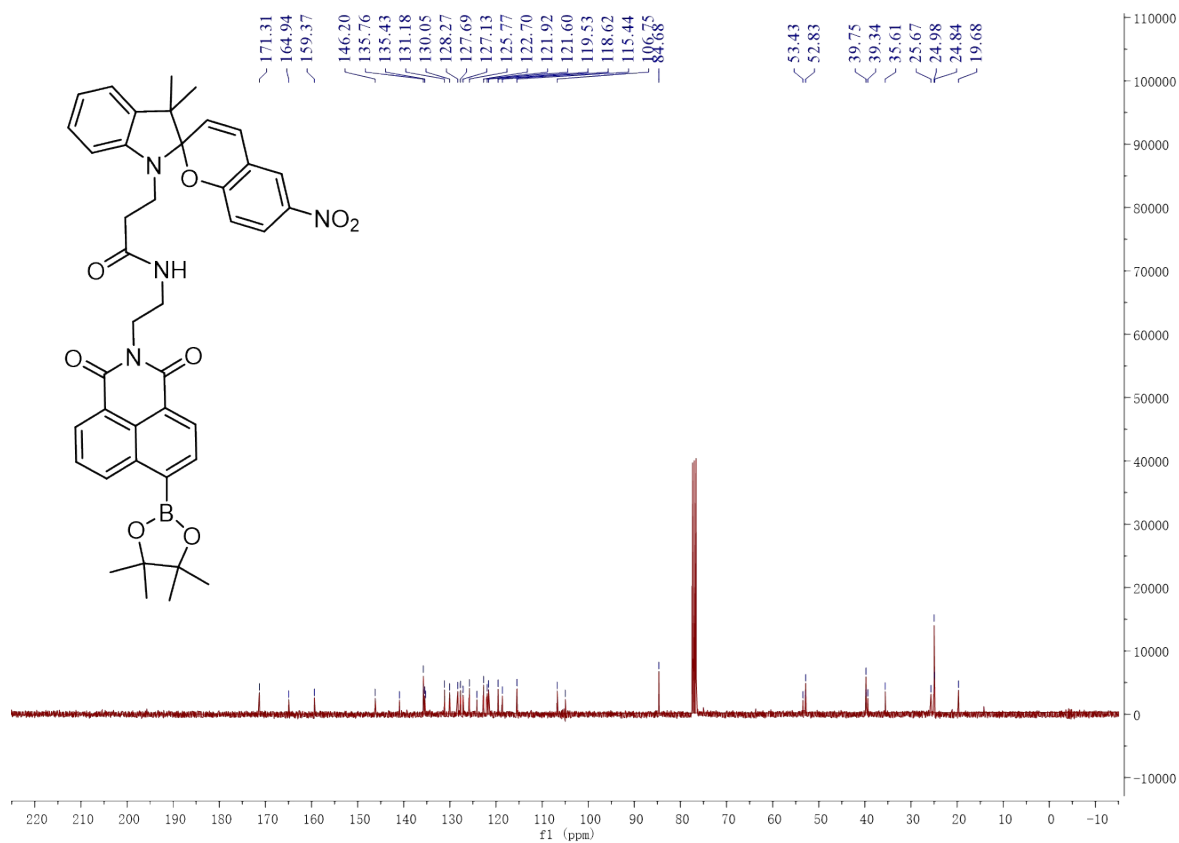

**Fig. S8.** <sup>13</sup>C NMR of Compound SP-Np-B.

**Analysis Info**

Analysis Name D:\Data\Nouwens\RZHANG.d  
Method Tune\_Wide\_Pos\_2018\_20180528.m  
Sample Name  
Comment

Acquisition Date 12/20/2018 8:48:07 AM

Operator BDAL@DE  
Instrument micrOTOF-Q 228888.00070

**Acquisition Parameter**

|             |            |                       |           |                  |           |
|-------------|------------|-----------------------|-----------|------------------|-----------|
| Source Type | ESI        | Ion Polarity          | Positive  | Set Nebulizer    | 0.4 Bar   |
| Focus       | Not active | Set Capillary         | 3200 V    | Set Dry Heater   | 180 °C    |
| Scan Begin  | 420 m/z    | Set End Plate Offset  | -500 V    | Set Dry Gas      | 4.0 l/min |
| Scan End    | 3000 m/z   | Set Collision Cell RF | 550.0 Vpp | Set Divert Valve | Source    |

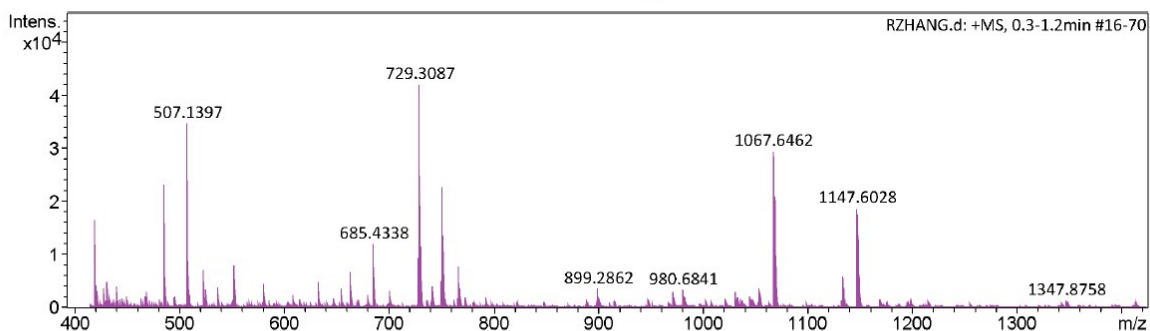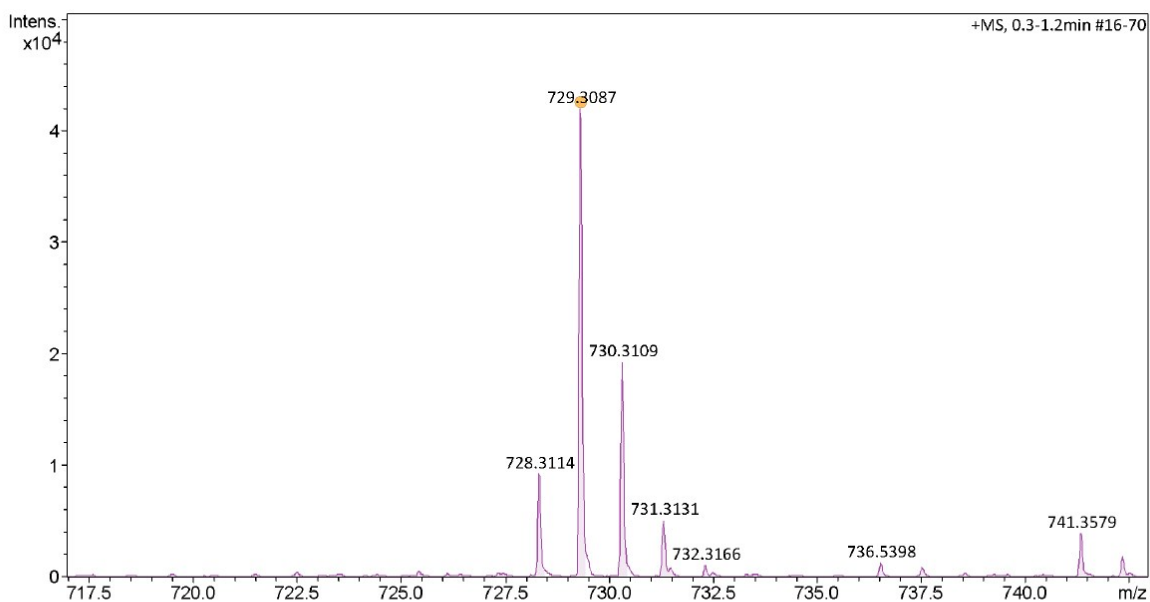

| Meas. m/z | # | Ion Formula | m/z      | err [ppm] | mSigma | # mSigma | Score  | rdb  | e <sup>-</sup> Conf | N-Rule |
|-----------|---|-------------|----------|-----------|--------|----------|--------|------|---------------------|--------|
| 729.3087  | 1 | C41H42BN4O8 | 729.3090 | 1.4       | 7.0    | 1        | 100.00 | 23.5 | even                | ok     |
|           | 1 | C41H42BN4O8 | 729.3090 | 1.4       | 7.0    | 1        | 100.00 | 23.5 | even                | ok     |

**Fig. S9.** MS of Compound SP-Np-B.

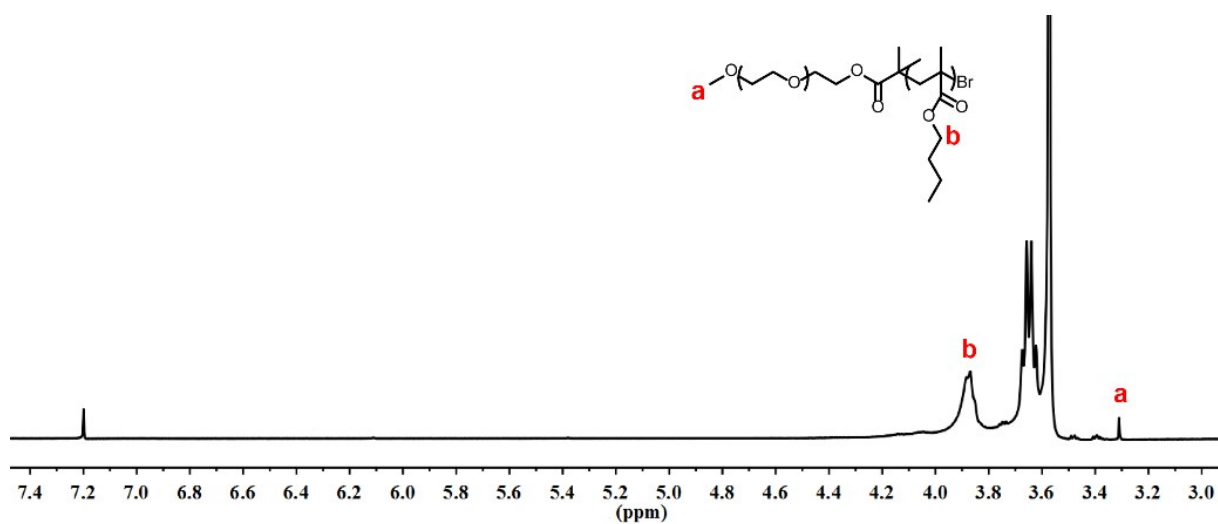

**Fig. S10.**  $^1\text{H}$  NMR of mPEG-b-PBMA.

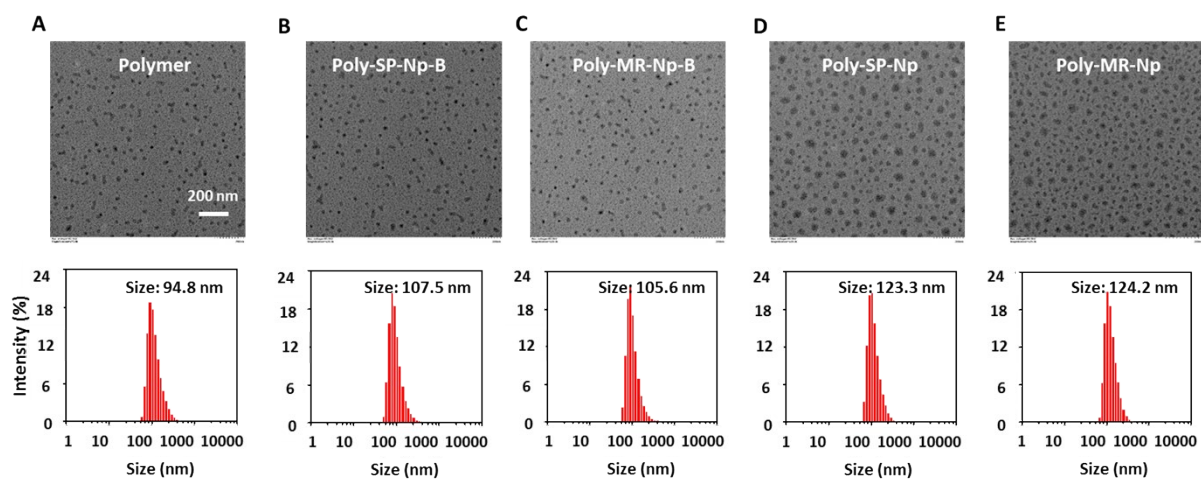

**Fig. S11. TEM image and DLS for different states of nanoprobe.** Polymer (A); Poly-SP-Np-B (B); Poly-MR-Np-B (C); Poly-SP-Np (D); Poly-MR-Np (E). The scale bar of TEM images is 200 nm.



### S3. Light-controlled multiple colour fluorescence response in solution

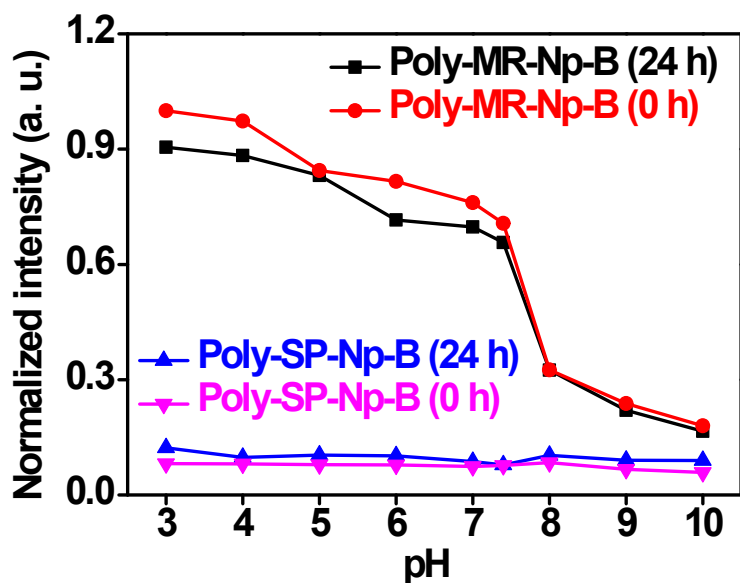

**Fig. S12.** pH stability of **Poly-SP-Np-B** and **Poly-MR-Np-B** (10  $\mu\text{M}$ ) with different pH and different hours at room temperature. All measurements were carried out in PBS buffer ( $\lambda_{\text{ex}} = 440 \text{ nm}$ ,  $\lambda_{\text{em}} = 605 \text{ nm}$ ).

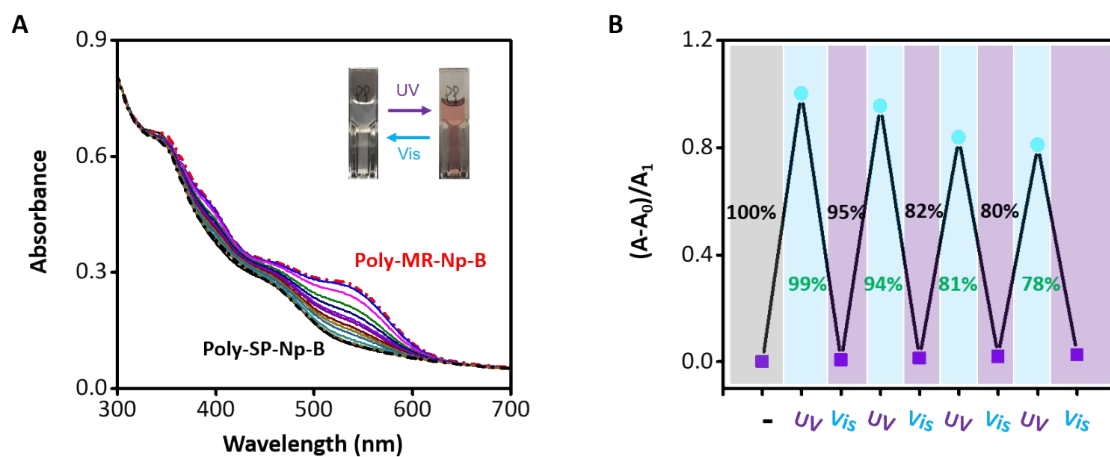

**Fig. S13.** UV-Vis absorption spectra of (A) **Poly-SP-Np-B** (10  $\mu\text{M}$ ) upon UV irradiation (365 nm) with time (0-10 s, interval: 1 s), and **Poly-MR-Np-B** (10  $\mu\text{M}$ ) upon visible (Vis) irradiation (550 nm) with time (0-20 s, interval: 2 s), and (B) UV-vis absorbance photo-switching ( $\lambda_{\text{abs}} = 540 \text{ nm}$ ) of **Poly-SP-Np-B** ( $A_0$ )/**Poly-MR-Np-B** ( $A_1$ ) (10  $\mu\text{M}$ ). All measurements were carried out in 0.01 M PBS buffer of pH 7.4.

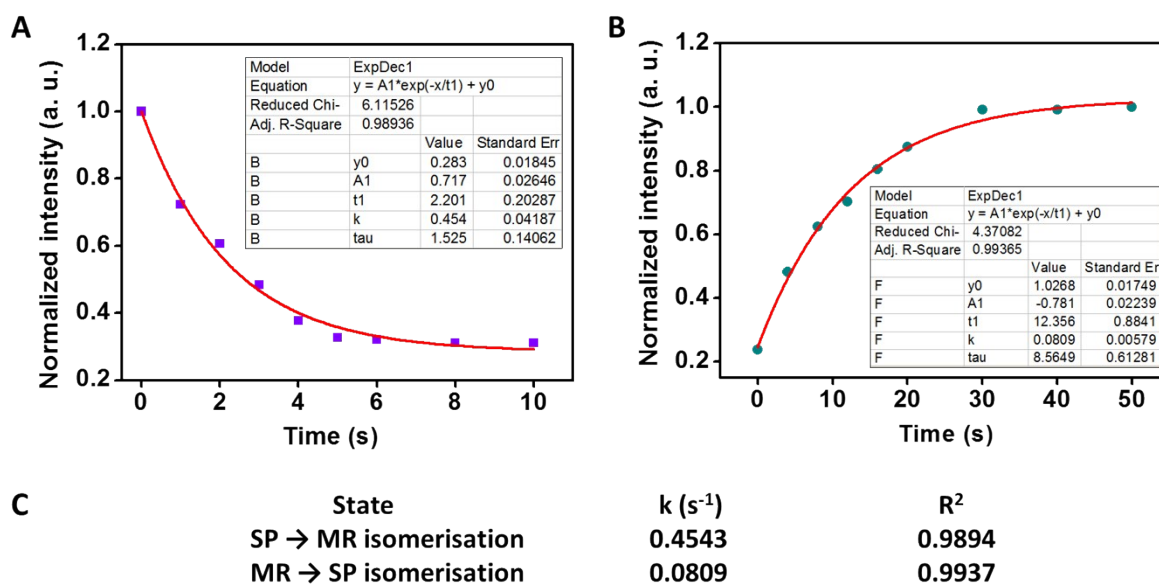

**Fig. S14.** Isomerization kinetics of **Poly-SP-Np-B** to **Poly-MR-Np-B** (SP  $\rightarrow$  MR) and **Poly-MR-Np-B** to **Poly-SP-Np-B** (MR  $\rightarrow$  SP). Kinetic trace (A, B) and key parameters (C) of **Poly-SP-Np-B** (10  $\mu$ M) in 0.01 M PBS Buffer of pH 7.4. The fluorescence intensity of the trace is normalized relative to the original fluorescence ( $\lambda_{ex} = 440$  nm,  $\lambda_{em} = 605$  nm).

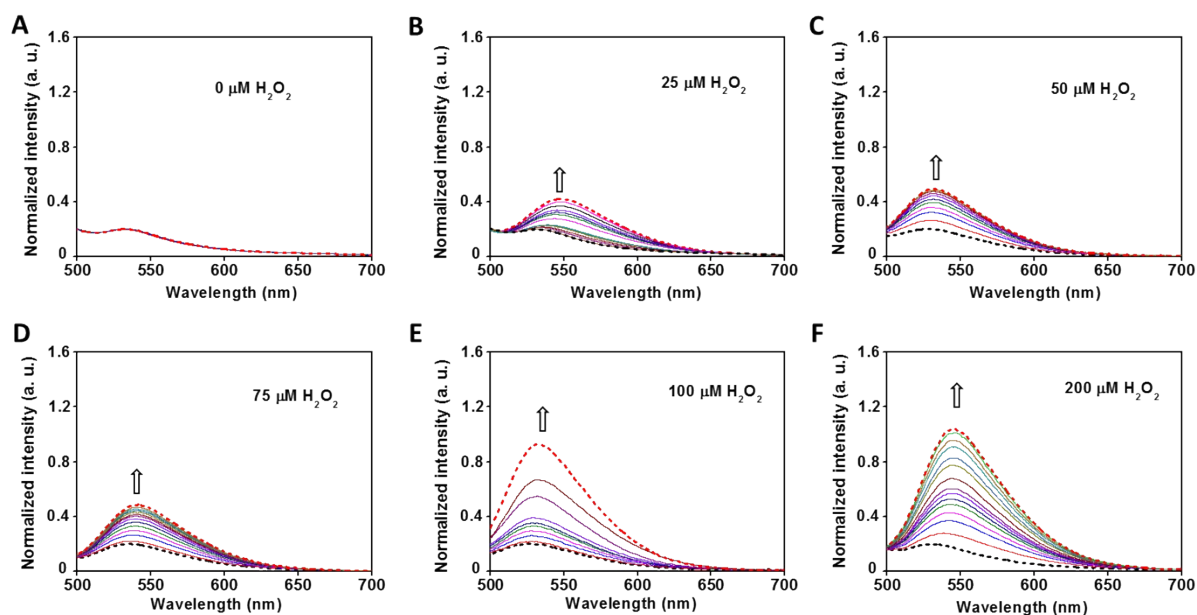

**Fig. S15.** Fluorescence spectra of **Poly-SP-Np-B** (10  $\mu\text{M}$ ) in the absence and presence of different concentration of  $\text{H}_2\text{O}_2$  in 0.01 M PBS buffer of pH 7.4. The concentrations of  $\text{H}_2\text{O}_2$  are: (A) 0  $\mu\text{M}$ , (B) 25  $\mu\text{M}$ , (C) 50  $\mu\text{M}$ , (D) 75  $\mu\text{M}$ , (E) 100  $\mu\text{M}$ , and (F) 200  $\mu\text{M}$ . All spectra were measured within 30 min with 2 min interval ( $\lambda_{\text{ex}} = 440 \text{ nm}$ ).

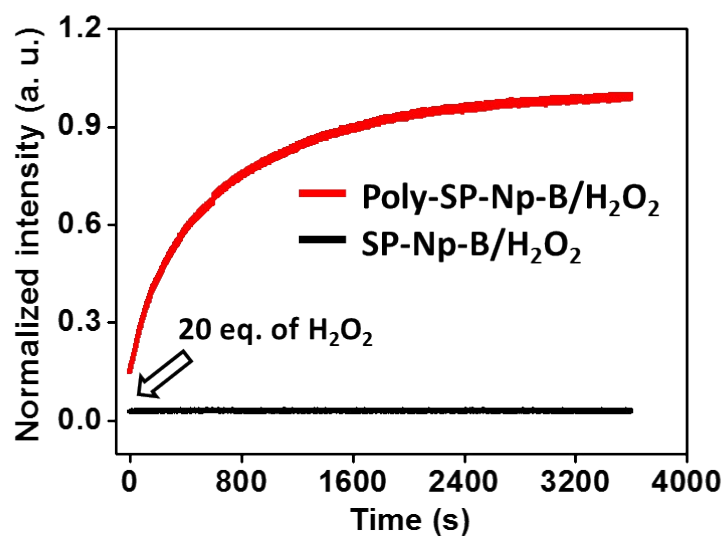

**Fig. S16.** Fluorescence response of probe **Poly-SP-Np-B** (conc. of SP-Np-B, 10  $\mu\text{M}$ ) and **SP-Np-B** (10  $\mu\text{M}$ ) with 20 equiv. of  $\text{H}_2\text{O}_2$  in PBS buffer of pH 7.4.

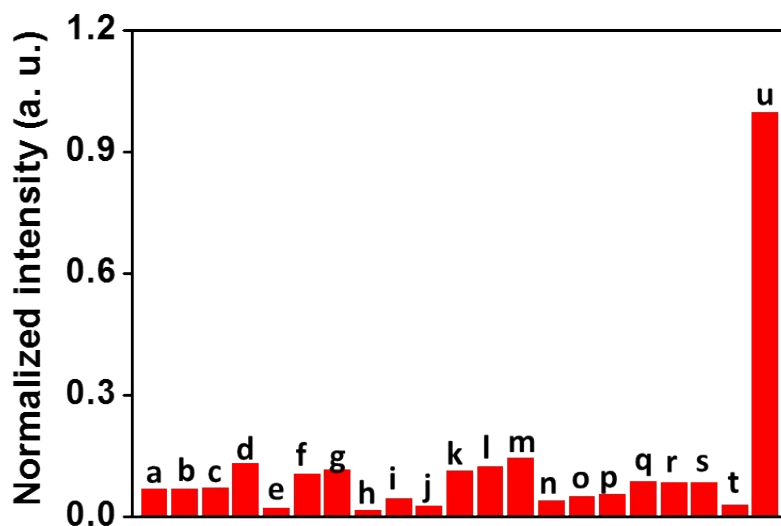

**Fig. S17.** Selective fluorescence response of **Poly-SP-Np-B** (10  $\mu\text{M}$ ) towards  $\text{H}_2\text{O}_2$  over other species (500  $\mu\text{M}$ ), including probe only (a), Cys (b), Hcy (c), GSH (d), NaF (e), NaCl (f), NaBr (g), NaI (h),  $\text{NaHCO}_3$  (i), NaHS (j),  $\text{Na}_2\text{CO}_3$  (k),  $\text{Na}_2\text{SO}_4$  (l),  $\text{ONOO}^-$  (m),  $\text{Na}_2\text{S}_2\text{O}_3$  (n), NaOCl (o),  $\text{CH}_3\text{COONa}$  (p),  $\text{NaNO}_3$  (q),  $\text{NaNO}_2$  (r),  $\text{Na}_2\text{HPO}_4$  (s),  $\text{NaH}_2\text{PO}_4$  (t) and 100  $\mu\text{M}$   $\text{H}_2\text{O}_2$  (u). All measurements were performed in 0.01 M PBS buffer of pH 7.4 ( $\lambda_{\text{ex}} = 440$  nm,  $\lambda_{\text{em}} = 531$  nm).

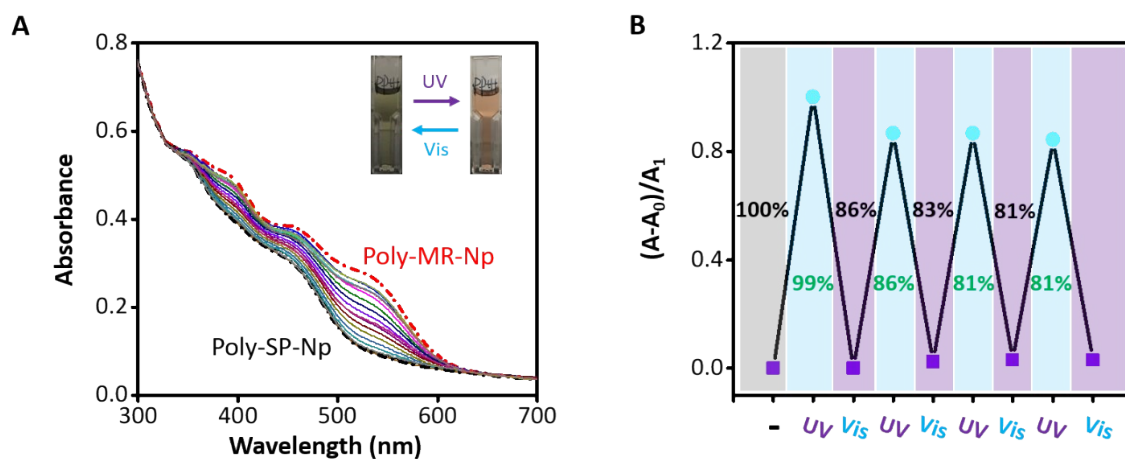

**Fig. S18.** UV-Vis absorption spectra of **Poly-SP-Np** (10 μM) upon UV irradiation (365 nm) with time (0-10 s, interval: 1 s) and **Poly-MR-Np** (10 μM) upon Vis irradiation (550 nm) with time (0-20 s, interval: 2 s) (A), and UV-Vis absorbance photo-switching (at 540 nm) of **Poly-SP-Np** ( $A_0$ )/**Poly-MR-Np** ( $A_1$ ) (10 μM) (B). All measurements were carried out in 0.01 M PBS buffer of pH 7.4.

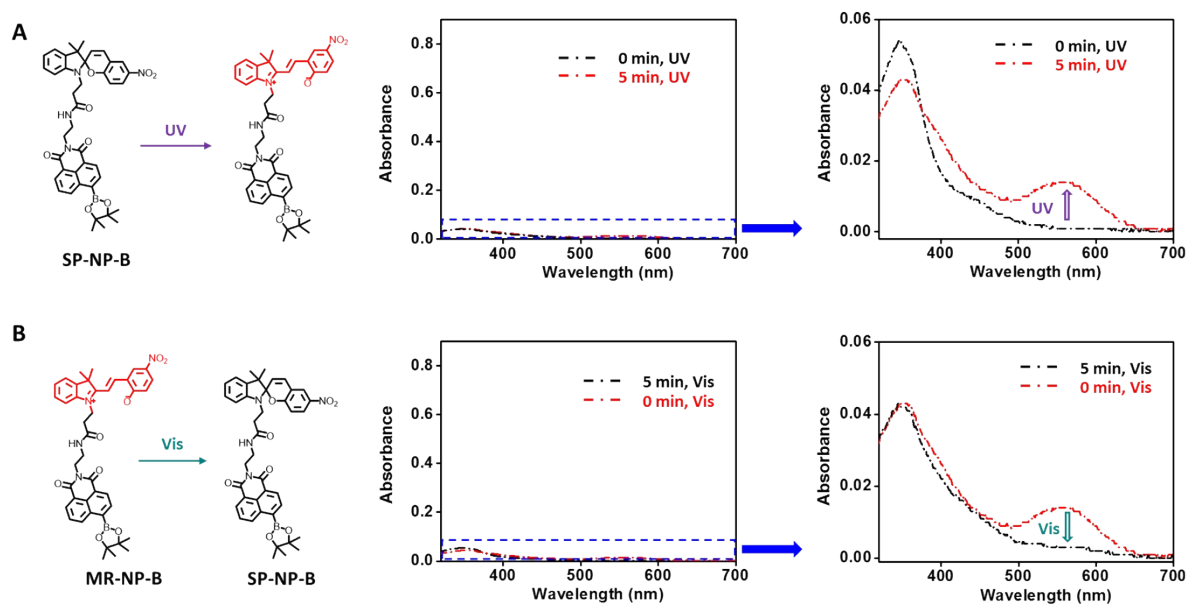

**Fig. S19.** UV-Vis absorption spectra of **SP-Np-B** (10  $\mu\text{M}$ ) upon UV irradiation (365 nm) with time (0-300 s), (A), and **SP-Np-B** (10  $\mu\text{M}$ ) upon visible light irradiation (530 nm) with time (0-300 s) (B). All measurements were carried out in 0.01 M PBS buffer of pH 7.4 (containing 1% DMSO (v/v) as the co-solvent).

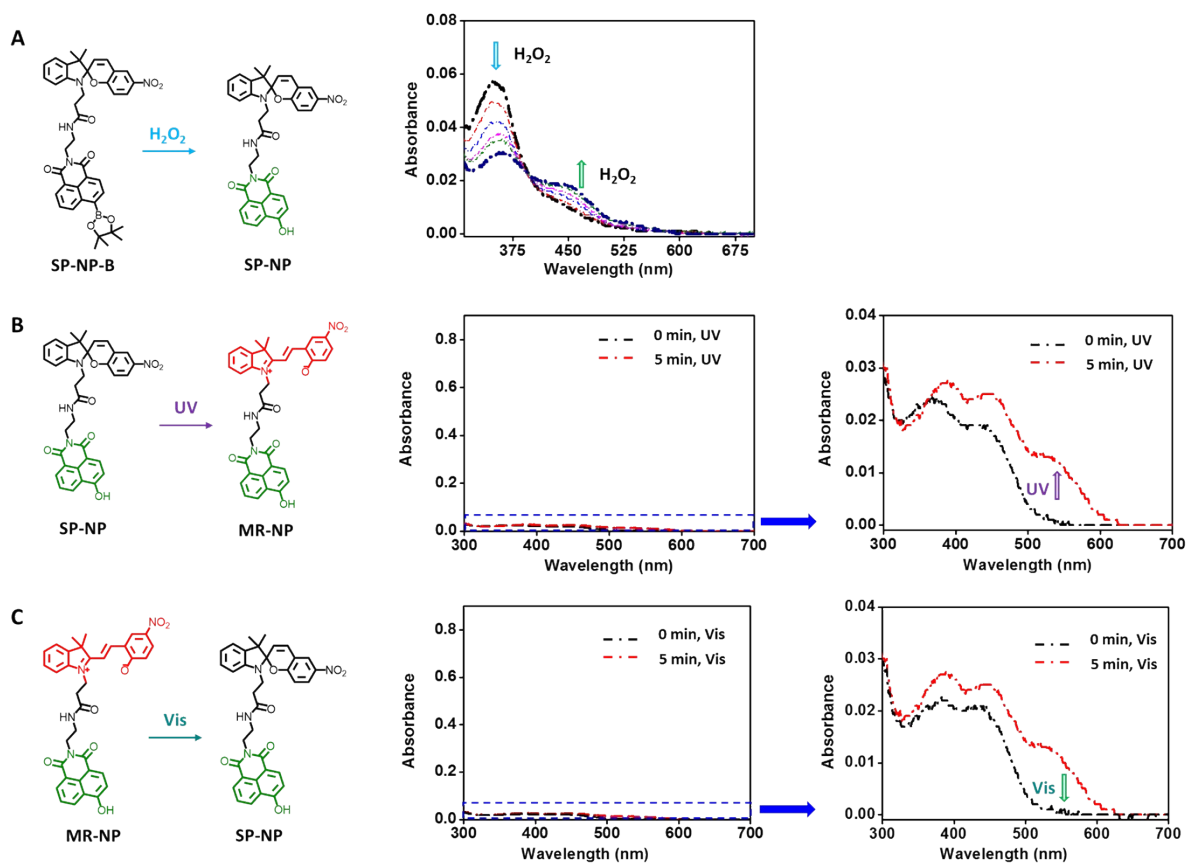

**Fig. S20.** UV-Vis absorption spectra of **SP-Np-B** (10  $\mu$ M) with 500  $\mu$ M  $H_2O_2$  (A). The spectra were measured within 600 s (interval: 120 s). **SP-Np** (10  $\mu$ M) upon UV irradiation (365 nm) with time (0-300 s) (B) and **MR-Np** (10  $\mu$ M) upon visible light irradiation (530 nm) with time (0-300 s) (C). All measurements were carried out in 0.01 M PBS buffer of pH 7.4 (containing 1% DMSO (v/v) as co-solvent).

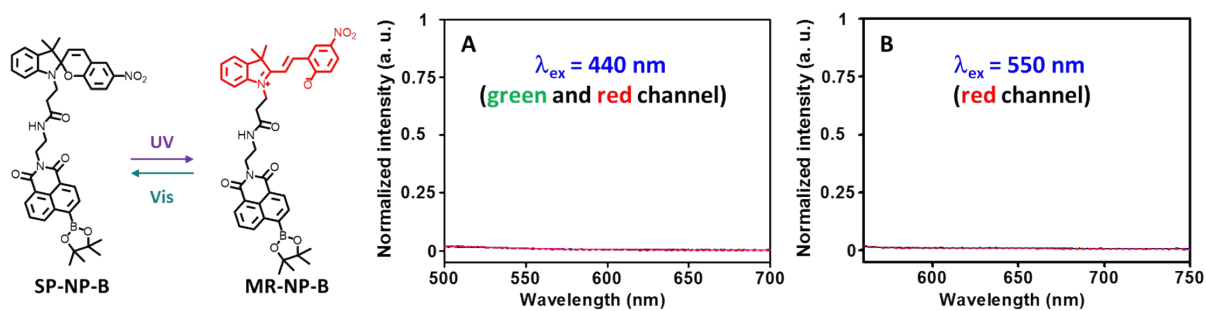

**Fig. S21.** Fluorescence spectra of **SP-Np-B** (10  $\mu$ M) upon UV light irradiation (365 nm, UV irradiation time: 0-300 s, interval: 30 s) and visible light irradiation (550 nm, Vis irradiation time: 0-300 s; interval: 60 s). Excitation was performed at 440 nm (A) for spectra of both green and red channel and at 550 nm (B) for red channel emission spectra. All measurements were carried out in 0.01 M PBS buffer of pH 7.4 (containing 1% DMSO (v/v) as the co-solvent).



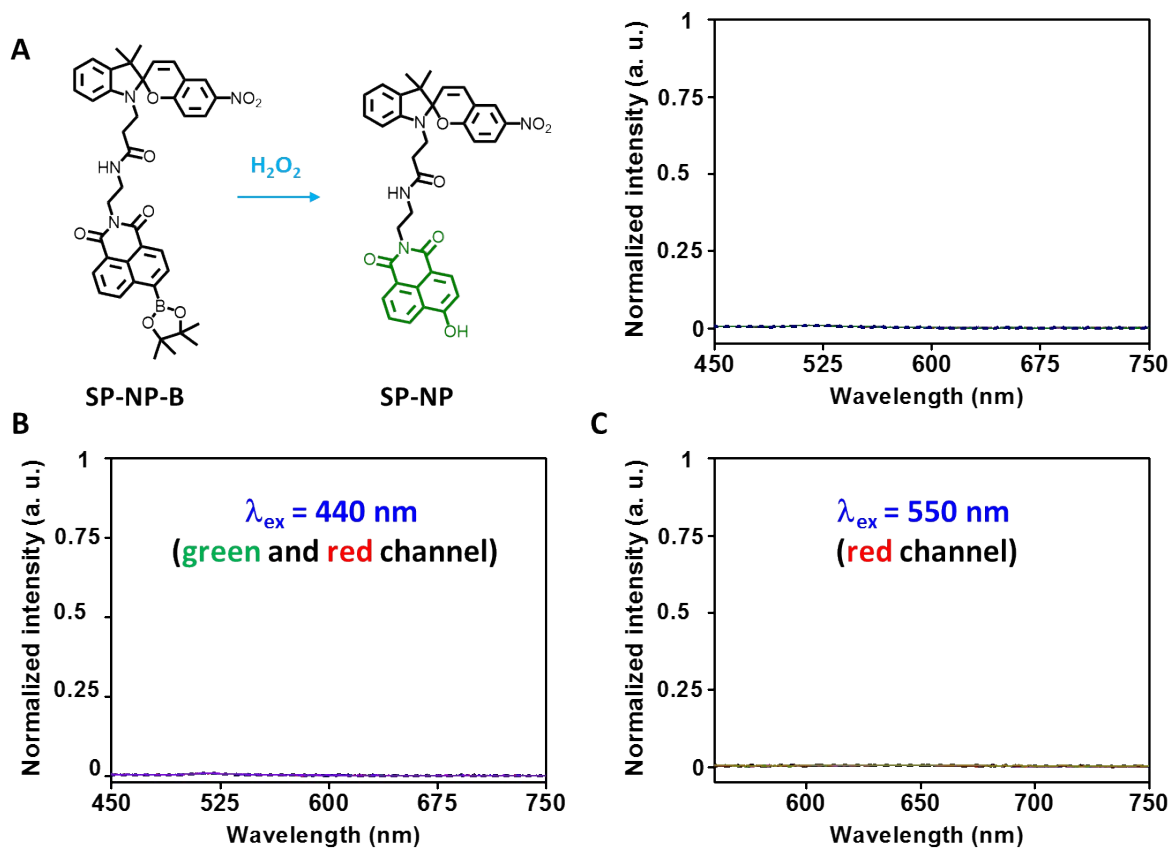

**Fig. S22.** Fluorescence spectra of SP-Np-B (10  $\mu$ M) with 500  $\mu$ M  $H_2O_2$ , with time (0-600 s; interval: 60 s) ( $\lambda_{ex} = 440$  nm) (A). UV light irradiation (365 nm, UV irradiation time: 0-300 s, interval: 30 s) and visible light irradiation (550 nm, Vis irradiation time: 0-300 s; interval: 60 s) were then conducted on the product of SP-Np-B (10  $\mu$ M) reacting with  $H_2O_2$ . Excitation was performed at 440 nm (B) for spectra of both green and red channel and at 550 nm (C) for red channel emission spectra. All measurements were carried out in 0.01 M PBS buffer of pH 7.4 (containing 1% DMSO (v/v) as the co-solvent).

#### S4. Light-controlled multiple colour fluorescence imaging

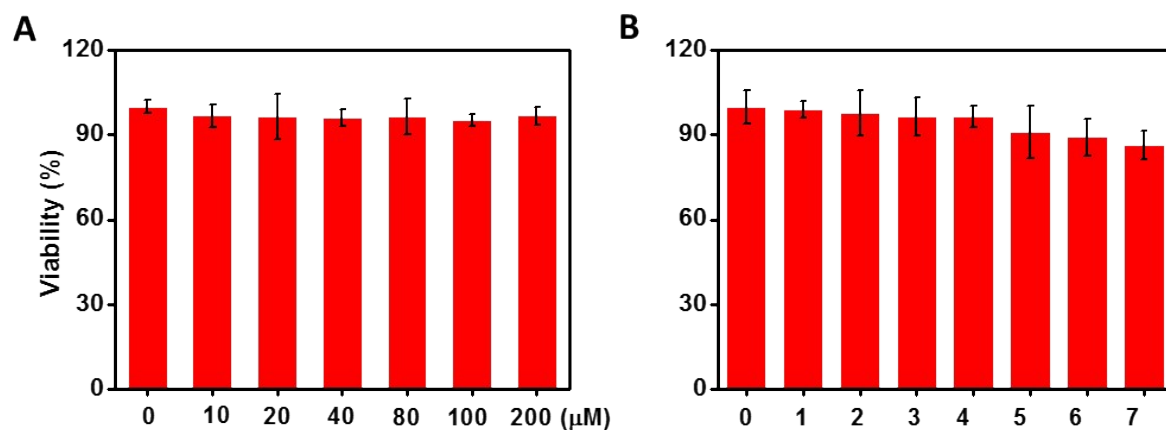

**Fig. S23.** MTT cytotoxicity assay. Viability of Raw 264.7 cell in the presence of increasing **Poly-SP-Np-B** (A). Viability of Raw 264.7 cell with **Poly-SP-Np-B** (10 μM) under 1-7 alternate UV/Vis irradiation cycles (B).



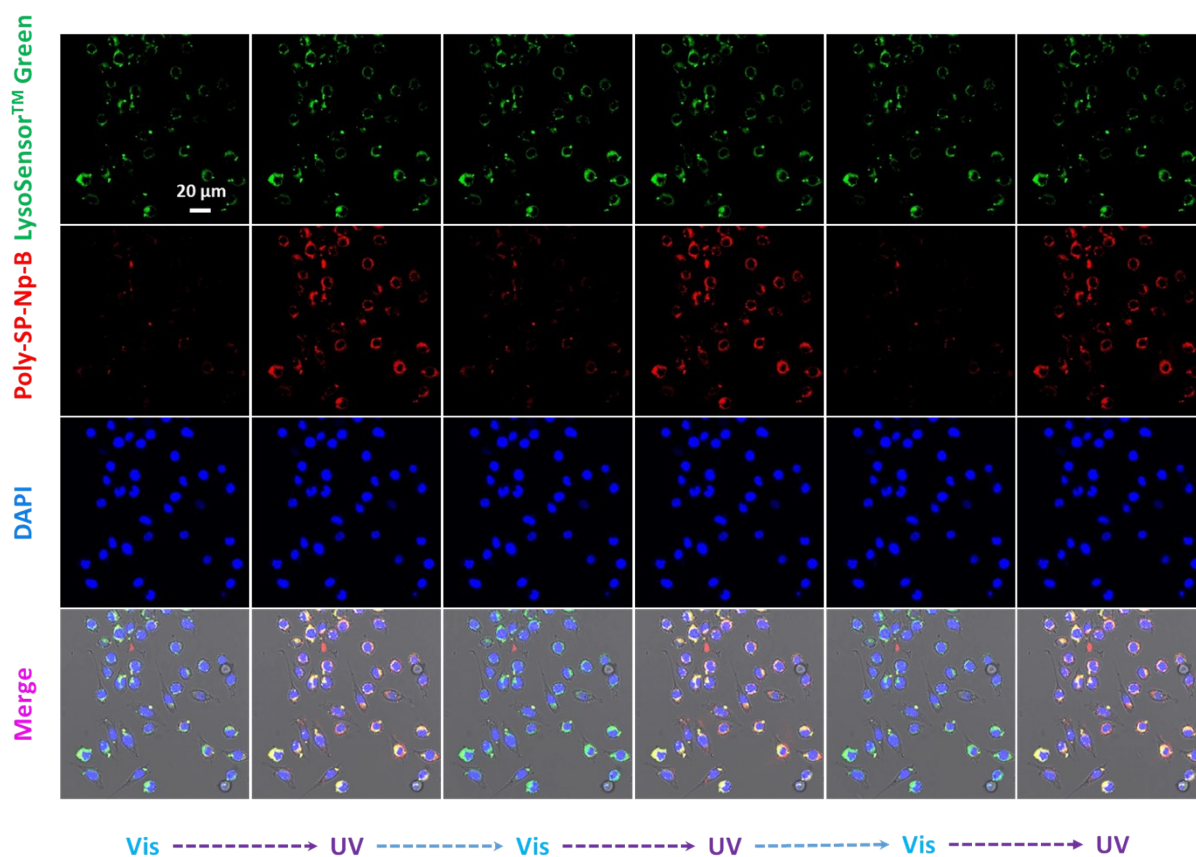

**Fig. S25.** UV/Vis cycling and colocalisation of **Poly-SP-Np-B** with LysoSensor™ Green in RAW 264.7 macrophage cells. The **Poly-SP-Np-B** and LysoSensor™ Green loaded RAW 264.7 macrophage cells were then irradiated by alternate UV/vis light irradiation for 10 s and 20 s, respectively. Scale bar is 20  $\mu\text{m}$ .

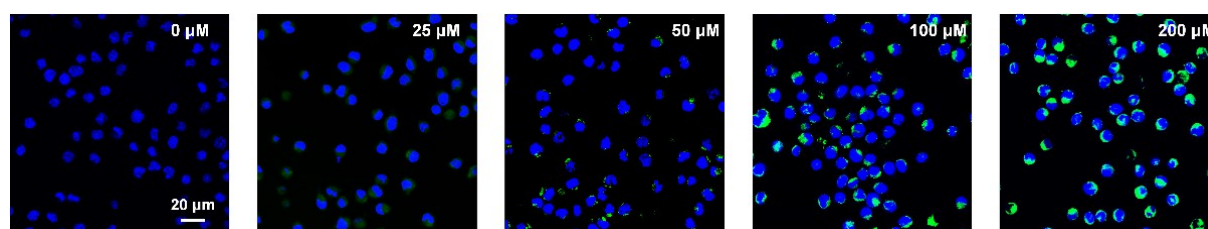

**Fig. S26.** Fluorescence imaging of RAW 264.7 macrophage cells incubated with **Poly-SP-Np-B** (10  $\mu\text{M}$ ) and treated with  $\text{H}_2\text{O}_2$  (0, 25, 50, 100, 200  $\mu\text{M}$ ). The cells were then stained with DAPI prior to confocal fluorescence imaging. Scale bar is 20  $\mu\text{m}$ .



Vis→UV→Vis→UV→Vis→UV. Scale bars are 20  $\mu\text{m}$  (A) and 10  $\mu\text{m}$  (B). The macrophage cells at each state were collected for flow cytometry analysis (C).

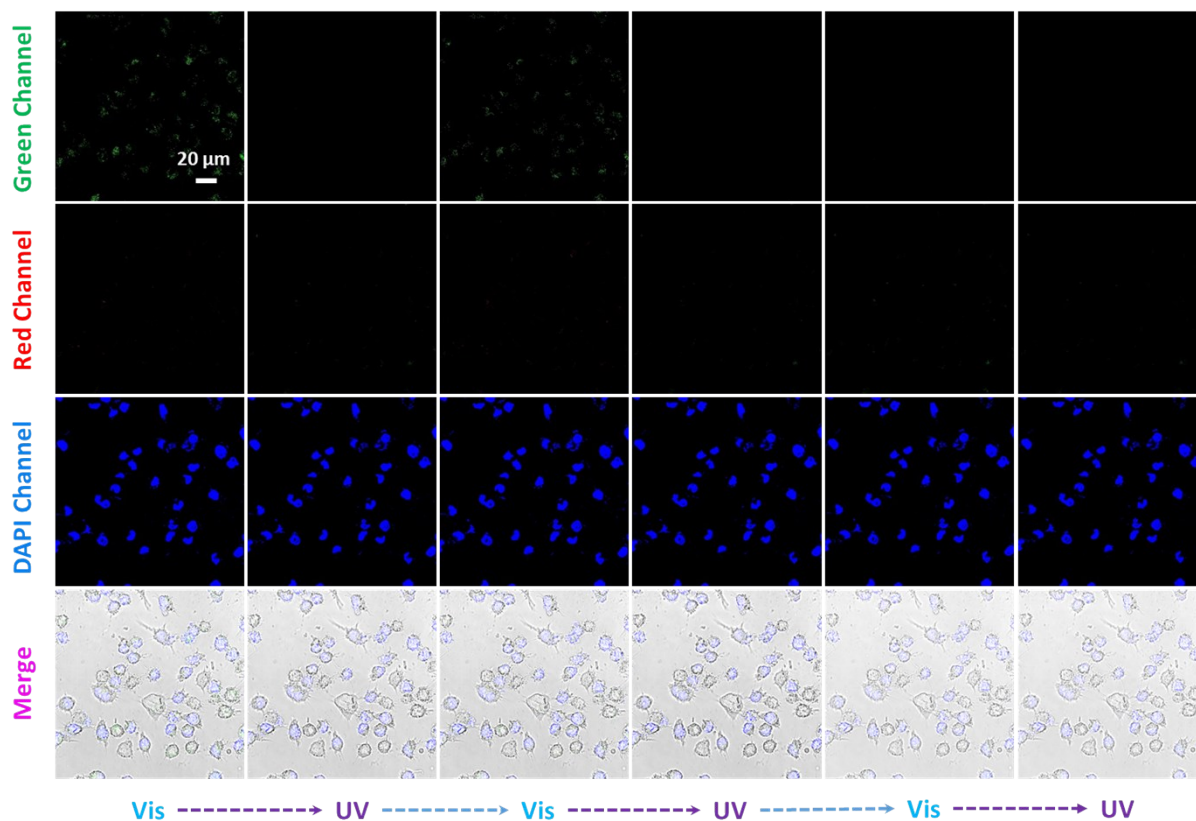

**Fig. S28.** UV/Vis cycling of RAW 264.7 macrophage cells incubated with SP-Np-B (10  $\mu\text{M}$ ) and then treated with exogenous  $\text{H}_2\text{O}_2$  (100  $\mu\text{M}$ ). The cells were then subjected to UV/vis light irradiation alternatively. The irradiation sequence is Vis→UV→Vis→UV→Vis→UV. Scale bar is 20  $\mu\text{m}$ .

## S5. References

- [1] Wang, T.; Wang, D.; Yu, H.; Wang, M.; Liu, J.; Feng, B.; Zhou, F.; Yin, Q.; Zhang, Z.; Huang, Y.; Li, Y., Intracellularly Acid-Switchable Multifunctional Micelles for Combinational Photo/Chemotherapy of the Drug-Resistant Tumor. *ACS Nano* **2016**, *10* (3), 3496-508.



- [2] Yu, H.; Guo, C.; Feng, B.; Liu, J.; Chen, X.; Wang, D.; Teng, L.; Li, Y.; Yin, Q.; Zhang, Z.; Li, Y., Triple-Layered pH-Responsive Micelleplexes Loaded with siRNA and Cisplatin Prodrug for NF-Kappa B Targeted Treatment of Metastatic Breast Cancer. *Theranostics* **2016**, *6* (1), 14-27.
- [3] Wang, D.; Wang, T.; Liu, J.; Yu, H.; Jiao, S.; Feng, B.; Zhou, F.; Fu, Y.; Yin, Q.; Zhang, P.; Zhang, Z.; Zhou, Z.; Li, Y., Acid-Activatable Versatile Micelleplexes for PD-L1 Blockade-Enhanced Cancer Photodynamic Immunotherapy. *Nano Lett.* **2016**, *16* (9), 5503-13.
- [4] Fu, Y.; Han, H. H.; Zhang, J.; He, X. P.; Feringa, B. L.; Tian, H., Photocontrolled Fluorescence "Double-Check" Bioimaging Enabled by a Glycophage-Protein Hybrid. *J. Am. Chem. Soc.* **2018**, *140* (28), 8671-8674.
- [5] Zhang, J.; Fu, Y.; Han, H. H.; Zang, Y.; Li, J.; He, X. P.; Feringa, B. L.; Tian, H., Remote light-controlled intracellular target recognition by photochromic fluorescent glycophages. *Nat. Commun.* **2017**, *8* (1), 987.
- [6] Duan, Q.; Jia, P.; Zhuang, Z.; Liu, C.; Zhang, X.; Wang, Z.; Sheng, W.; Li, Z.; Zhu, H.; Zhu, B.; Zhang, X., Rational Design of a Hepatoma-Specific Fluorescent Probe for HOCl and Its Bioimaging Applications in Living HepG2 Cells. *Anal. Chem.* **2019**, *91* (3), 2163-2168.
